# Supplementary material for: Measurable residual disease analysis in paediatric acute lymphoblastic leukaemia patients with ABL-class fusions
Source: PubMed Central journal article supplement (PMC9427854; doi:10.1038/s41416-022-01806-6), 2022-06-01
Supplement: 41416_2022_1806_MOESM2_ESM.pdf [file 41416_2022_1806_MOESM2_ESM.pdf]

**Supplementary Table2 Patient-specific primers and probes for ABL fusion qPCR**

| Patient |       | Fusion                   | Forward Primer                                    | Reverse Primer                             | Probe                                                                                 |
|---------|-------|--------------------------|---------------------------------------------------|--------------------------------------------|---------------------------------------------------------------------------------------|
| 1       | A2489 | EBF1-CDX1-PDGFRB         | TGG TTC CTG AGT CCC CAG AGT                       | CCT CCT CTT CTG TCC CCA ATC T              | TG ATG TGT GA TCT GGG AGC AAA GAA GCA                                                 |
| 2       | A3363 | EBF1-PDGFRB              | TGTGGGAGCATGGGTGAAAT                              | CTCTTTAGCCTCTGCACACAATCTC                  | AGCTCTAGACAGGTTGTACCTAAGGCTGGGTCTCT                                                   |
| 3       | A5258 | EBF1-PDGFRB              | GGA AGG AAG CCT GCA TCT TCT                       | CAT CAC CTC CAT CCT CAC TTA CG             | CA GCC ATA AC CCA GGG CCG AAC A                                                       |
| 4       | A5491 | EBF1-PDGFRB              | AGGTAGATACACAAAAGCATCAAGACA                       | CCCCTAGACCCATATATTTGTTTTTAAT               | TGGTAGGCATTGTTCATACTGTTTTTTTAAAAAAGAA<br>ATAGC                                        |
| 5       | A5901 | EBF1-PDGFRB              | TGT CCA CCG CGC AAG G                             | TTG GTG GAA AGC GAA TGT AGA CTT            | TT GTG TCG GC CTG TGG CAA AAG GT                                                      |
| 6       | A6788 | PDGFRB/EBF1<br>(+strand) | TCT ACT TTC GCT TTC CAC CAA AA                    | AGC CAA GGC AGA TGT GAC ACT T              | AT TCC CTG GG GAA CCC TCC CCT GT                                                      |
| 7       | A7103 | EBF1-PDGFRB              | TTCCCTAACGGCTCAGCTG                               | CCACCAGGGCCAGGATG                          | CCCCTATGCCACCTTGCCCTTTAA                                                              |
| 8       | A7360 | EBF1-PDGFRB              | TTCCCCTGATGGCAATTGTT                              | GACCGGCCTGGCCAA                            | CCAATGGTTGCCTATGACCAACCTTTTGTATT                                                      |
| 9       | A7869 | EBF1-PDGFRB              | CAC CTC CAT CCT CAC TTA CGC A                     | GCA TAC AGA CAT ACA CTG TGG GGT<br>TTA     | AT TCA CTC AC TGT AGG CCG TAC TAT TTG CAT GTT<br>TAA GC                               |
| 10      | A8052 | CD74-PDGFRB              | GCT TGC AGT GAC ATC TTG CTT AAA                   | TGC AAA ATA ATG ATG TGC CAG TCT            | AC CCA CCA AA TTC TTT GGC AGA AGG TAA GCC                                             |
| 11      | A7366 | AT7IP-PDGFRB             | AACATTTTAAGCTTCCTGAATCAGGAT                       | ACAACCTGCTGGAGGAGTGACAAG                   | ACCTCATGATCCCATCTTTCTAGCTTCTGTTTTCTTTC                                                |
| 12      | A5047 | ETV6-ABL1                | TGC CTC AGC TTC CCA AAG TG                        | AAC CCT GGT CTC CTG CCT ATT T              | CC GTG TCT AT TGG GGG TGG GAG ACA TAA                                                 |
| 13      | A6619 | ETV6-ABL1                | CGT GGC AAC AAC CTC TAA AGG                       | CAA CAC AGC AAA AGA GAC AAG ACC T          | AG GAT CTG CC TTT TAT TTA CCC TGA TAT CTC TTC<br>AGG                                  |
| 14      | A6224 | IGSF11-ABL               | CAGAAAGTGAAGAGGAAGCAGACA                          | CTGGAGAGCAAAATTCACATGTTATAA                | AAGGAGGAAGAGAACTAGAGGCAATCACCT                                                        |
| 15      | A7328 | ABL-SNX2                 | ACATGGCTAACCTGCTCT                                | GTGCAGTGCTCAATCTC                          | TCTTGTGTACCCCCCCCAGTG                                                                 |
| 16      | A6382 | NUP214-ABL               | GAC AGA ATG AGA CCC TGT CTC AAA                   | CCA GAT TTC AAA GCT GCT CCT T              | CG CTC TGT TG CCA CCC TTT TGC TC                                                      |
| 17      | A6919 | NUP214-ABL               | AAC ACT CAC CTT AAG AAG TAC TCC<br>CTT T          | TGT GTA ACT ACT AAA AAT CTC CAA ATT<br>CCT | CT CCC AGT TA GAG CAC GAC TTC TCA TAC ACT TAT<br>AAA TG                               |
| 18      | A7236 | NUP214-ABL               | GGT ACT CCT ATG TCT ATT TGT TAT<br>GGT TAT CTT TA | TCC ATT CCC ATG TTC TTA AGC AT             | TC TGG AAG GA GAC AGG GGC TTT CCT CA<br>ACACAGCTGAATTAATTATACTCAGTCTCCTGAGTAGC<br>TGG |
| 19      | A7830 | NUP214-ABL               | CCAGCCCCCAATCACTTTA                               | ATGAAAATTAGTGGCGGGTACCT                    |                                                                                       |
| 20      | A4852 | SSBP2-CSF1R              | GGC ACC CGA GCT AGA AAC TTA AA                    | GGG TGA TAG TAC CAT TAG TGC CTG TT         | AG TGG ACC CC CGA GGG AGT TCG AC                                                      |
| 21      | A6464 | SSBP2-CSF1R              | GGC GGA CTG CAG GTG AAC T                         | ACA TAT TTT TGA GCA GTC TGC CTT TT         | TG CGT TAT AG CTT GGG GCT CCC TTC AAG ATA A                                           |
