# Supplementary material for: Measurable residual disease analysis in paediatric acute lymphoblastic leukaemia patients with ABL-class fusions
Source: Br J Cancer. 2022 Jun 1;127(5):908–15. doi: 10.1038/s41416-022-01806-6 (PMC9427854; doi:10.1038/s41416-022-01806-6)
Supplement: Supplementary file 1 — Supplementary Table 1 [file 41416_2022_1806_MOESM1_ESM.pdf]

| Patient |       | Fusion                   | Patient Breakpoint Sequences                                                                                                                                                                                                                                                                                                                                                                                                                                                                                                                                                                                                                                                                                                                                                                                                                                                                                                                                                                                          |
|---------|-------|--------------------------|-----------------------------------------------------------------------------------------------------------------------------------------------------------------------------------------------------------------------------------------------------------------------------------------------------------------------------------------------------------------------------------------------------------------------------------------------------------------------------------------------------------------------------------------------------------------------------------------------------------------------------------------------------------------------------------------------------------------------------------------------------------------------------------------------------------------------------------------------------------------------------------------------------------------------------------------------------------------------------------------------------------------------|
| 1       | A2489 | EBF1-CDX1-PDGFRB         | GCTGTGTTCTTGAGACTTGCTGGGGCCTGGGGAAGGGGCATGGTTCCTGAGTCCCCAGAGTGTGATGTGTGATCT/GG<br>G/AGCAAAGAAGCATAGATTGGGGACAGAAGAGGAGGGAATGAGTTCCATAGGACCTCATGGGTGCCCAGCAG                                                                                                                                                                                                                                                                                                                                                                                                                                                                                                                                                                                                                                                                                                                                                                                                                                                           |
| 2       | A3363 | EBF1-PDGFRB              | CTCAGAGCTGGTCTTCCACTCAGGCTGTCCACACTGTCTGCCAGATACCCACTTGCTCAGAGAATGTGTATGCATGTGTG<br>GGAGCATGGGTGAAATGAGGGGATGAAAGAAGCCCACCATCCACCACAGGGCAGGGGACAGGAGGCAGCTCTAGAC<br>AGG/TGTG/ACCTAAGGCTGGGTCTCTTTGCCCTGCTGAGATTGTGTGCAGAGGCTAAAGAGGCAAGTCCCAGAGT<br>GTGGGCCCCACCTGCCAGCACAGCACCTGGGGGTGCAGTGGGCAGAAAGAAGAGCTTAAAGTGAGATGTTTACATTAAT<br>TTGACTTTAATTTCTCCATCCGATGTCCATCAC                                                                                                                                                                                                                                                                                                                                                                                                                                                                                                                                                                                                                                              |
| 3       | A5258 | EBF1-PDGFRB              | GCCTCTCCCGCTCATCACATCTCGGTCTGCTGGAAGGAAGCCTGCATCTCTAGGCAGCAT/AACCCAGGGCCGAAC<br>A/GCAGTGAGTGAATCCCTCGGTGCTGCAAGTGAAGGATGGAGGTGATGATGCCAAGGCATGCCTGGGCAGT                                                                                                                                                                                                                                                                                                                                                                                                                                                                                                                                                                                                                                                                                                                                                                                                                                                              |
| 4       | A5491 | EBF1-PDGFRB              | GAATAAATGAAGCACACTCATACAGGTGCATGTATGCATAAGGACGGGCAGGTAGATACACAAAAGCATCAAGACACT<br>GGTAGGCATTGTTTCATAC//TGTTTTTTTAAAAAAGAAATAGCCAAGTTTATACATGATAGCACAAAATTGAAATTAA<br>AACAAATATATGGGTCTAGGGGTGGGTTTGGCCCACTCC                                                                                                                                                                                                                                                                                                                                                                                                                                                                                                                                                                                                                                                                                                                                                                                                          |
| 5       | A5901 | EBF1-PDGFRB              | ATTCATATCCATGGCTTATAGACTGTGTTTGACACGTGTGTACCATATTGTGT/CCACCGCGCAAGGTGGAGGGGTCT<br>ATA/TGTGTG/GCCTGTGGCAAAGGTGCAAGTCTACATTGCTTCCACCAAAATCTATTCTGCGTGCCT                                                                                                                                                                                                                                                                                                                                                                                                                                                                                                                                                                                                                                                                                                                                                                                                                                                                |
| 6       | A6788 | PDGFRB/EBF1<br>(+strand) | CTGCCTCCCCAAGGATCTTTTCTATCTGGGCTGGAGGTGGGTCCAGGCACCTTTATTAAGACAGCGGGAGTTTAAAGCCT<br>GTGGCAAAAGGTGCAAGTCTACTTTCGCTTTCACCAAAATCTATTG/CCTGGGGAAACCTCCCTCT/GTCACACAAAGTG<br>TCACATCTGCCTTGGCTCAGAGCTGGTCTTCCACTCAGGCTGTCCACACTGTCTGCCAGATACCCACTTGCTCAGAGAAT<br>GTGTATGCATGTGTGGGAGCATGGGTGAAATGAGGGGATGAAGAAGCCCAACCATCCACCACAGGGCAGGGGACAG<br>GAGGCAGCTCTAGACAGGCACGTGCCTGACATG                                                                                                                                                                                                                                                                                                                                                                                                                                                                                                                                                                                                                                         |
| 7       | A7103 | EBF1-PDGFRB              | ACCCACTTGCTCAGAGAATGTGTATGCATGTGTGGGAGCATGGGTGA/GCACACACCCAGACCCCACTTAAGT/AAATGTC<br>AGAGCGAGATCAAGAGATTGTGAGAACACGGGTTATGACATTTATAGATAAGGAGGCCAGTTCCTCTGAGGT                                                                                                                                                                                                                                                                                                                                                                                                                                                                                                                                                                                                                                                                                                                                                                                                                                                         |
| 8       | A7360 | EBF1-PDGFRB              | ATTAGAAGGGGTCAATTTTCCCTGATGGCAATTGTGTCATGA/CAAT/GGTTGCCTATGACCAAC/TTTGTATTTTTA<br>GTAGAAATGGGATTTACCATA/TGGCCAGGAGCTTCAAGTACTCTGACCTCGTATCCGCCACCTTGCCCTCCCAA<br>GTGTGGGATTACGACATGAGCAGCTGACCCAGCTTCACTTC                                                                                                                                                                                                                                                                                                                                                                                                                                                                                                                                                                                                                                                                                                                                                                                                            |
| 9       | A7869 | EBF1-PDGFRB              | TAGCTTCTCTTGAACATTTGAGAAGATCAGTGGCTGTGAGCAGGCATTCTGCCAGTGGCATTGGTGGGAGCTGAGT<br>CACTGCCCAGGCATGCCCTTGGCATCATCAGCTCCATCTCTACCTACGCA/CCAGGGGATTCACTCACTG/TAGGCCGTAC<br>TATTGTCATGT/TAGGCCATGTACATGAGCATGCCTAATCCAGACATCTGTTAAACCCACAGTGTATGTCTGTATGC<br>ATGTACCGGTGGGTACACAATTCCTGTACATGTGTACAAGCAATGCATGTACAATTCCTTGCATGCATGCAAACTGGCAT<br>AGTGCATGTCTGTAAGCATATAATTGGAGCAC                                                                                                                                                                                                                                                                                                                                                                                                                                                                                                                                                                                                                                            |
| 10      | A8052 | CD74-PDGFRB              | CTTGCTGAGGTCGAGGGTCTGGATGGTGAGTCCAGGAGCATGAGAAATTCATCAGGCCACACAGGCTCAGGCACCT<br>ATACTCTGCCACCCCTGCAGGATGGATATTACCATTTGAAATACTTTGGC/GCTTGCAGTGAGATCTGCTTAAAGAA<br>GAAACCCACCAAATCT//TTGGCAGAAGGTAAGCCCTCCTGGCCAGTGGGTGA/AGACTGGCAGCATCATTATTTG<br>ATAAATCCACCCCTCTGCCCTCCTGAATGCTGCGTGATCTGCCACATGCAGGGCTCAGCATGGAACCTCAGTGGGGA<br>CTTGTGACGCTGGCTGTCTCAGCTTCCTCACCC                                                                                                                                                                                                                                                                                                                                                                                                                                                                                                                                                                                                                                                   |
| 11      | A7366 | AT7IP-PDGFRB             | TTACCATTTCTGTATTCCACATTTTAAGCTTCTGGAATCAGGATTACAGCAGCTCATGATCCCATCTTTCTA//GCTTCTGT<br>TTTCTTCTATAGTATCTTCAACCAATCTTGCTACCTCTCAGCAGTGTGTCAGTAGTCAACCTAAAT                                                                                                                                                                                                                                                                                                                                                                                                                                                                                                                                                                                                                                                                                                                                                                                                                                                              |
| 12      | A5047 | ETV6-ABL1                | GGGTTTCAGGCGATTCTCCTGCCTCAGTGTCTGAGTAGCTGGGATTACAGGCACACGCCACCATGCCTGGCTAAGTTTTT<br>GTATTTTTAGTAGAGACGGGTTTCGCACGTTGGTCAGGCTGGTCTCAAACCTCTGGCCTCAAGTGATCCACC/GCCTC<br>AGCTTCCCAAAGTGCTGGGATTACAGCGTGTAGCCACACGCCGGCCGTGTCT/ATTGGGGGTGGGAG/ACATAAAG<br>AGAAGAGATGTGGGACAATATAAATAGGCAGGAGACAGGGTGTAGACCCGGTACTATCACATTTCCAGCCTACCCCT<br>GAAAAATTCAGGTGAGC/GTGGAACAACCTCTAAGGATCTAGGAACCTAAAGAGGATCTGCCTTTTATTTA//CCCT<br>GATATCTCTTCAAGGGGTTGAGAGGTAAAACCTATTTCTGTTAATGAGTACCAAGGCTTGTCTCTTTGTGTGTGA<br>CGTTTGACAGTAATGGTACAAAAGTAAAGCAGGTGTCTTAGCATGATTC                                                                                                                                                                                                                                                                                                                                                                                                                                                              |
| 13      | A6619 | ETV6-ABL1                | AGTCCATTCTCACATTGCTATAAAGAACTACCTGAGTCTGGGTAATTTATAAGAAAAAGAGCTTCAGTTCGCTCACAGTTC<br>TGCAGGATGTACAGAAAGCATGGCAGAGGAGGCCCTCAGGAAACTTACAATCATGA/CAGAAAGTGAAAGAGGAAGCAGA<br>ATATGCTCATACGTGCTAGAGAGGAGGAAGAGAA//CTAGAGGCAATCACCTCGAGGTTTATGTGTCTCTTAGAA<br>CATCTGTGTGCATATAAGCATTTATTTAATGACATGTGAATTTGCTCCAGCTCTTTTGTGAATATGCATGTTTATAGCAG<br>AGCTTCAGCAGAGTTGCAGGAAGGGACATTTACACAGCCTCTTAGATGTTTAAAGGTTTACCCGCCCTGACAGTGGCTCA<br>GCAGGCGTAGGCCCTCCTGGTGAAGAGCCGAGCAGATGGCTAACCTGTCTAGTGTGTGTGTGTGTGTGTGTGTGTGTGT<br>A/CCCCCCCC/CAGTGAGCTGAGATTGAGCCACTGCATCTCTGCTGGTGAGCAGAGCAAGACTCTATCTTTAAAAAAA<br>AAAAAAAAAAAAATTTACTTCTCAAATGGTCTTTTCTGTGTGTGTGTGTGTGTGTGTGTGTGTGTGTGTGTGTGT<br>CAAAAAATGTTAAATTCGCACAGATGGTGGCACACAGCTGTGTGCCAGTACTCGGAGGCTGAAGCAGGAGGATC<br>ACTTGAGCGCTGCAGTGAGCTGTGATTGCACCACTGCATCCAGCCTGGGTGACAGAAATGAGACCTGTCTCAAAATAA<br>ATAAATATGTAACATACTGAAAGTGTTGAAACATATATATATATATATATTTTTGAGACGGAGTCTCGCTCTGTTGCCACC<br>C/T/TTTGCTCGTTAAGGAGCAGCTTGAATCTGAGCTCAGGGGATATCCAAAACAACACTGCATGTTTCTAAGGGA |
| 14      | A6224 | IGSF11-ABL               | CTTGTTGTGTGATTACATAAACAATAAGAAGTCTGGATTTTCATCCCTCTAACACAGATTGACTTTCTGAAAGGGGAGAAA<br>AGGCTTGTGCTAGGCCACCACTACTCCCGTAGCAGCAGTGTATAGGCCCTCAGGCTTCTTAAAGATCTCCCTTTAG<br>AGGGTGCTCCCAAGTAGAGCAC//GACTTCTACACTTATAAAGCATATCTTTATGTGGACTGTGTAATGAAATGAAATG<br>GTATTTAGGAATTTGGAGATTTTAGTAGTTACACAAGAATCAATGAAAAAGAACGAGCTGGTTTCCAAAGCTGATATG<br>ATTTGAAACAGTGGGGCCAAGACATTTGGTGATTTGCCAGCTCGTCTTTGGAGAGCAGAAACCACTGGCATTTCAC<br>GCTCTGGAGGAGGAAGTGTGGCATCCCAAGGCTTTGGGTTTTCTCTCCTCAACAAAAAGAGTACTCTATGTCTATTGTT<br>ATGGTTATCTTTATATATGATTTGTTTATGCATAGATATCTGGAAGGAGACA/GG/GCCTTCTCAGCAGTCTGGAAT<br>CTCGTTGTCCATTCTAGCTTTAAGAACATCGGAATGGAAGGGGTGGGAGCTCTATATATGTGGATGGGTTGTCTCA                                                                                                                                                                                                                                                                                                                                            |
| 15      | A7328 | ABL-SNX2                 | ACCATGCCAGAGCCCCAACATCTTTTAAATTAAGTATATGTTTATCCACAATCCACATAAGTACACAGCTGAATTA<br>ATTAT//ACTCAGTCTCCTGAGTAGCTGGGATTACAGGTACCCGCCACTAATTTTCATATTTTGCTGG                                                                                                                                                                                                                                                                                                                                                                                                                                                                                                                                                                                                                                                                                                                                                                                                                                                                  |
| 16      | A6382 | NUP214-ABL               | GTGCTGCAGCTGGGCTCCTCCCTGGCACCAGCTAGAAACTTAAAGGAAGTGG/ACCCCGAGGGAGTTCGAC/T<br>ATGGTGCACACGGCCTAATGGTACTATACCCAGGGGTGCGCCAGCTTAGAGCCACAGCCAATGAACCTGG                                                                                                                                                                                                                                                                                                                                                                                                                                                                                                                                                                                                                                                                                                                                                                                                                                                                   |
| 17      | A6919 | NUP214-ABL               | AACCTCCAGGCTCGATTTGGAAGGGCGGAGCTCAGGTGAACCTCAGAGCCTGCGTTATAGCTGGG/GCTCC/CTTC<br>AAGATAAACCTGACAGATCTTTAAAGGACGAGCTGCTCAAAAATATGTGCTTACAGATATGTGTATTAAAA                                                                                                                                                                                                                                                                                                                                                                                                                                                                                                                                                                                                                                                                                                                                                                                                                                                               |
| 18      | A7236 | NUP214-ABL               | GTGCTGCAGCTGGGCTCCTCCCTGGCACCAGCTAGAAACTTAAAGGAAGTGG/ACCCCGAGGGAGTTCGAC/T<br>ATGGTGCACACGGCCTAATGGTACTATACCCAGGGGTGCGCCAGCTTAGAGCCACAGCCAATGAACCTGG                                                                                                                                                                                                                                                                                                                                                                                                                                                                                                                                                                                                                                                                                                                                                                                                                                                                   |
| 19      | A7830 | NUP214-ABL               | GTGCTGCAGCTGGGCTCCTCCCTGGCACCAGCTAGAAACTTAAAGGAAGTGG/ACCCCGAGGGAGTTCGAC/T<br>ATGGTGCACACGGCCTAATGGTACTATACCCAGGGGTGCGCCAGCTTAGAGCCACAGCCAATGAACCTGG                                                                                                                                                                                                                                                                                                                                                                                                                                                                                                                                                                                                                                                                                                                                                                                                                                                                   |
| 20      | A4852 | SSBP2-CSF1R              | GTGCTGCAGCTGGGCTCCTCCCTGGCACCAGCTAGAAACTTAAAGGAAGTGG/ACCCCGAGGGAGTTCGAC/T<br>ATGGTGCACACGGCCTAATGGTACTATACCCAGGGGTGCGCCAGCTTAGAGCCACAGCCAATGAACCTGG                                                                                                                                                                                                                                                                                                                                                                                                                                                                                                                                                                                                                                                                                                                                                                                                                                                                   |
| 21      | A6464 | SSBP2-CSF1R              | AACCTCCAGGCTCGATTTGGAAGGGCGGAGCTCAGGTGAACCTCAGAGCCTGCGTTATAGCTGGG/GCTCC/CTTC<br>AAGATAAACCTGACAGATCTTTAAAGGACGAGCTGCTCAAAAATATGTGCTTACAGATATGTGTATTAAAA                                                                                                                                                                                                                                                                                                                                                                                                                                                                                                                                                                                                                                                                                                                                                                                                                                                               |

| Patient |       | Fusion                   | Patient Breakpoint Sequences                                                                                                                                                                                                                                                                                                                                                                                                                                                                                                                                                                                                                                                                                                                                                                                                                                                                                                                                                                                   |
|---------|-------|--------------------------|----------------------------------------------------------------------------------------------------------------------------------------------------------------------------------------------------------------------------------------------------------------------------------------------------------------------------------------------------------------------------------------------------------------------------------------------------------------------------------------------------------------------------------------------------------------------------------------------------------------------------------------------------------------------------------------------------------------------------------------------------------------------------------------------------------------------------------------------------------------------------------------------------------------------------------------------------------------------------------------------------------------|
| 1       | A2489 | EBF1-CDX1-PDGFRB         | GCTGTGTTCTTGAGACTTGCTGGGGCCTGGGGAAGGGGCATGGTTCCTGAGTCCCCAGAGTGTGATGTGTGATCT/GG<br>G/AGCAAAGAAGCATAGATTGGGGACAGAAGAGGAGGGAATGAGTTCCATAGGACCTCATGGGTGCCCAGCAG                                                                                                                                                                                                                                                                                                                                                                                                                                                                                                                                                                                                                                                                                                                                                                                                                                                    |
| 2       | A3363 | EBF1-PDGFRB              | CTCAGAGCTGGTCTTCCACTCAGGCTGTCCACACTGTCTGCCAGATACCCACTTGCTCAGAGAATGTGTATGCATGTGTG<br>GGAGCATGGGTGAAATGAGGGGATGAAAGAAGCCCACCATCCACCACAGGGCAGGGGACAGGAGGCAGCTCTAGAC<br>AGG/TGTT/ACCTAAGGCTGGGTCTCTTTGCCCTGCTGAGATTGTGTGCAGAGGCTAAAGAGGCAAGTCCCAGAGT<br>GTGGGCCCCACCTGCCAGCACAGCACCTGGGGGTGCAGTGGGCAGAAAGAAGAGCTTAAAGTGAGATGTTTACATTAAT<br>TTGACTTTAATTTCTCCATCCGATGTCCATCAC                                                                                                                                                                                                                                                                                                                                                                                                                                                                                                                                                                                                                                       |
| 3       | A5258 | EBF1-PDGFRB              | GCCTCTCCCGCTCATCACATCTCGGTCTGCTGGAAGGAAGCCTGCATCTTCTAGGCAGCAT/AACCCAGGGCCGAAC<br>A/GCAGTGAGTGAATCCCCCTGGGTGCTGAAGTGAAGGATGGAGGTGATGATGCCAAGGGCATGCCTGGGCAGT                                                                                                                                                                                                                                                                                                                                                                                                                                                                                                                                                                                                                                                                                                                                                                                                                                                    |
| 4       | A5491 | EBF1-PDGFRB              | GAATAAATGAAGCACACTCATAcAGGTGCATGTATGCATAAGGACGGGCAGGTAGATACACAAAAGCATCAAGACACT<br>GGTAGGCATTGTTTCATAC//TGTTTTTTTAAAAAAGAAATAGCCAAGTTTATACATGATAGCACAAAATTGAAATTAA<br>AACAAATATATGGGTCTAGGGGTGGGTTTGGCCCACTCC                                                                                                                                                                                                                                                                                                                                                                                                                                                                                                                                                                                                                                                                                                                                                                                                   |
| 5       | A5901 | EBF1-PDGFRB              | ATTCATATCCATGGCTTATAGACTGTGTTTGACACGTGTGTACCATATTGTGT/CCACCGCGCAAGGTGGAGGGGTCT<br>ATA/TGTGTGCG/GCCTGTGGCAAAAGGTGCAAGTCTACATTGCTTCCACCAAAATCTATTCTGCGTGCCT                                                                                                                                                                                                                                                                                                                                                                                                                                                                                                                                                                                                                                                                                                                                                                                                                                                      |
| 6       | A6788 | PDGFRB/EBF1<br>(+strand) | CTGCCTCCCCAAGGATCTTTTCTATCTGGGCTGGAGGTGGGTCCAGGCACCTTTATTAAGACAGCGGGAGTTTAAAGCCT<br>GTGGCAAAAGGTGCAAGTCTACTTTCGCTTTCACCAAAATCTATTG/CCTGGGGAAACCTCCCTCT/GTCACACAAAGTG<br>TCACATCTGCCTTGGCTCAGAGCTGGTCTTCCACTCAGGCTGTCCACACTGTCTGCCAGATACCCACTTGCTCAGAGAAT<br>GTGTATGCATGTGTGGGAGCATGGGTGAAATGAGGGGATGAAAGAAGCCCACCATCCACCACAGGGCAGGGGACAG<br>GAGGCAGCTCTAGACAGGCACGTGCCTGACATG                                                                                                                                                                                                                                                                                                                                                                                                                                                                                                                                                                                                                                  |
| 7       | A7103 | EBF1-PDGFRB              | ACCCACTTGCTCAGAGAATGTGTATGCATGTGTGGGAGCATGGGTGA/GCACACACCAGACCCCACTTAAGT/AAATGC<br>AGAGCGAGATCAAGAGATTGTGAGAACACGGGTTATGACATTTATAGATAAGGAGGCCAGTTCCTCTGAGGT                                                                                                                                                                                                                                                                                                                                                                                                                                                                                                                                                                                                                                                                                                                                                                                                                                                    |
| 8       | A7360 | EBF1-PDGFRB              | ATTAGAAGGGGTCAATTTTCCCTGATGGCAATTGTGTCATGA/CAAT/GGTTGCCTATGACCAAC/TTTGTATTTTTA<br>GTAGAAATGGGATTTACCATA/TGGCCAGCCAGCTTCAAGTCTGACCTCGATCCGCCACCTTGCCCTCCCAA<br>GTGTGGGATTACGACATGAGCAGCTGACCCAGCTTCACT                                                                                                                                                                                                                                                                                                                                                                                                                                                                                                                                                                                                                                                                                                                                                                                                          |
| 9       | A7869 | EBF1-PDGFRB              | TAGCTTCTCTTGAACATTTGAGAAGATCAGTGGCTGTGAGCAGGCATTCTGCCAGTGGCATTGGTGGGAGCTGAGT<br>CACTGCCCAGGCATGCCCTTGGCATCATCAGCTCCATCTCTACGCA/CCAGGGGATTCACTCACTG/TAGGCCGTAC<br>TATTGTCATGT/TAGGCCATGTACATGAGCATGCCTAATCCAGACATCTGTTAAACCCACAGTGTATGTCTGTATGC<br>ATGTACCGGTGGGTACACAATTCCTGTACATGTGTACAAGCAATGCATGTACAATTCCTTGCATGCATGCAAACTGGCAT<br>AGTGCATGTCTGTAAGCATATAATTGGAGCAC                                                                                                                                                                                                                                                                                                                                                                                                                                                                                                                                                                                                                                         |
| 10      | A8052 | CD74-PDGFRB              | CTTGCTGAGGTCGAGGGTCTGGATGGTGAGTCCAGGAGCATGAGAAATTCATCAGGCCACACAGGCTCAGGCACCT<br>ATACTCTGCCACCCCTGCAGGATGGATATTACCATTTGAAATACTTTGGC/GCTTGCAGTGAGATCTGCTTAAAGAA<br>GAAACCCACCAAATCT//TTGGCAGAAGGTAAGCCCTCCTGGCCAGTGGGTGA/AGACTGGCAGCATCATTATTTG<br>ATAAATCCACCCCTCTGCCCTCCTGAATGCTGCGTGATCTGCCACATGCAGGGCTCAGCATGGAACCTCAGTGGGGA<br>CTTGTGACGCTGGCTGTCTCAGCTTCTCCACCC                                                                                                                                                                                                                                                                                                                                                                                                                                                                                                                                                                                                                                            |
| 11      | A7366 | AT7IP-PDGFRB             | TTACCATCTGTGATTCCACATTTTAAGCTTCTGGAATCAGGATTACAGCAGCTCATGATCCCATCTTTCTA//GCTTCTGT<br>TTTCTTCTATAGTATCTTCAACCAATCTTGCTACTCTCAGCAGTGTGTCAGTAGTCAACCTAAAT                                                                                                                                                                                                                                                                                                                                                                                                                                                                                                                                                                                                                                                                                                                                                                                                                                                         |
| 12      | A5047 | ETV6-ABL1                | GGGTTTCAGGCGATTCTCCTGCCTCAGTGTCTGAGTAGCTGGGATTACAGGCACACGCCACCATGCCTGGCTAAGTTTTT<br>GTATTTTTAGTAGAGACGGGTTTCGCACGTTGGTCAGGCTGGTCTCAAACCTCTGGCCTCAAGTGATCCACC/GCCTC<br>AGCTTCCCAAAGTGCTGGGATTACAGCGTGTGAGCCACACGCCGGCCGTGTCT/ATTGGGGGTGGGAG/ACATAAAG<br>AGAAGAGATGTGGGACAAATATAAATAGGCAGGAGACAGGGTGTAGACCCGGTACTATCACATTTCCAGCCTACCCCT<br>GAAAAATTCAGGTGAGCGTGGGCAACAACCTCTAAGGATCTAGGAACCTAAAGAGGATCTGCCTTTTATTTA//CCCT<br>GATATCTCTTCAAGGGGTTGAGAGGCTAAACCTATTTCTGTTAATGAGTACCAAGGCTTGTCTCTTTGTGTGTGA<br>CGTTTGACAGTAATGGTACAAAAGTAAAGCAGGTGTCTTAGCATGATTC                                                                                                                                                                                                                                                                                                                                                                                                                                                    |
| 13      | A6619 | ETV6-ABL1                | AGTCCATTCTCACATTGCTATAAAGAACTACCTGAGTCTGGGTAATTTATAAAGAAAAGAGCTTCAGTTCGCTCACAGTTC<br>TGCAGGATGTACAGAAAGCATGGCAGAGGAGGCCCTCAGGAAACTTACAATCATGA/CAGAAAGTGAAAGAGGAAGCAGA<br>ATAGTCTCATGCTAGAGAGGAGGAAGAGAA//CTAGAGGCAATCACCTCGAGGTTTATGTGTCTCTTAGAA<br>CATCTGTGTGCATATAAGCATTATTTATAGACATGTGAATTTGCTCCAGCTCTTTTGTGAATATGCATGTTTATAGCAG<br>AGCTTCAGCAGAGTTGCAGGAAGGGACATTACACAGCCTCTTAGATGTTTAAAGGTTTACCCGCCCTGACAGTGGCTCA<br>GCAGGCGTAGGCCTCCTGGTGAAGAGCCGAGCAGATGGCTAACCTGTCTGGTGAGTGTGTGTGTGTGTGTGTGTGTGT<br>A/CCCCCCCC/CAGTGAGCTGAGATTGAGCCACTGCATCTCTGCTGGTGAGCAGAGCAAGACTCTATCTTTAAAAAAA<br>AAAAAAAAAAAAATTTACTTCTCAAATGGTCTTTTCTGTGTGTGTGTGTGTGTGTGTGTGTGTGTGTGTGTGTGT<br>CAAAAAATGTTAAATTCGCACAGATGGTGGCACACAGCTGTGTGCCAGTCTCGGAGGCTGAAGCAGGAGGATC<br>ACTTGAGCGCTGCAGTGAGCTGTGATTGCACCACTGCATCCAGCCTGGGTGACAGAAATGAGACCTGTCTCAAAATAA<br>ATAAATATGTAACATACTGAAAGTGTTGAAACATATATATATATATATATTTTTGAGACGGAGTCTCGCTCTGTTGCCACC<br>C/T/TTTGCTGTGTTAAGGAGCAGCTTGAATCTGAGCTCAGGGGATATCCAAAACAACACTGCATGTTTCTAAGGGA |
| 14      | A6224 | IGSF11-ABL               | CTTGTTGTGTGATTACATAAACAATAAGAAGTCTGGATTTTCATCCCTCTAACACAGATTGACTTTCTGAAAGGGGAGAAA<br>AGGCTTGTGCTAGGCCACCACTACTCCCGTAGCAGCAGTGTATAGGCCCTCAGGCTTCTTAAAGATCTCCCTTTAG<br>AGGGTGCTCCCAAGTAGAGCAC//GACTTCTACACTTATAAAGCATATCTTTATGTGGACTGTGTAATGAAATGAAATG<br>GTATTTAGGAATTTGGAGATTTTATAGTAGTTACACAAGAATCAATGAAAAAGAACGAGCTGGTTTCCAAAGCTGATATG<br>ATTTGAAACAGTGGGGCCAAGACATTTGGTGATTTGCCAGCTCGTCTTGGAGAGCAGAAACCCACTGGCATTTCAT<br>GCTCTGGAGGAGGAAGTGTGGCATCCCAAGGCTTTGGGTTTTCTCTCCTCAAAACAAAGAGTACTCTATGTCTATTGTT<br>ATGGTTATCTTTATATATGATTTGTTTATGCATAGATATCTGGAAGGAGACA/GG/GCCTTCTCAGCAGTCTGGTAAAT<br>CTCGTTGTCCATTCTAGCTTTAAGAACATCGGAATGGAAGGGGTGGGAGCTCTATATATGTGGATGGGTTGTCTCA<br>CCATGCTCCAGGCCCAACATCACTTTATTTTTAATTGAAGTATATGTTTATCCACAATCCACATAAGTACACAGCTGAATTA<br>ATTAT//ACTCAGTCTCCTGAGTAGCTGGGATTACAGGTACCCGCCACTAATTTTCATATTTTGCTG                                                                                                                                                                    |
| 15      | A7328 | ABL-SNX2                 | GTGCTGAGCTGGGCTCCTCCCTGGCACCAGCTAGAAACTTAAAGGAAGTGG/ACCCCGAGGGAGTTCGAC/T<br>ATGGTGCACAGGCACTAATGGTACTACCCAGGGGTGCGCCAGCTTAGAGCCACAGCCAAATGAACCTG                                                                                                                                                                                                                                                                                                                                                                                                                                                                                                                                                                                                                                                                                                                                                                                                                                                               |
| 16      | A6382 | NUP214-ABL               | AACCTCCAGGCTCGATTTGGAAGGGCGGAGCTCAGGTGAACCTCAGGCTCTGCGTTATAGCTGGG/GCTCC/CTTC<br>AAGATAAACACCTGACAGATCTTTAAAGGACGAGCTGCTCAAAATATGTGCTTACAGATATGTGATTAAAA                                                                                                                                                                                                                                                                                                                                                                                                                                                                                                                                                                                                                                                                                                                                                                                                                                                        |
| 17      | A6919 | NUP214-ABL               | GAATAAATGAAGCACACTCATAcAGGTGCATGTATGCATAAGGACGGGCAGGTAGATACACAAAAGCATCAAGACACT<br>GGTAGGCATTGTTTCATAC//TGTTTTTTTAAAAAAGAAATAGCCAAGTTTATACATGATAGCACAAAATTGAAATTAA<br>AACAAATATATGGGTCTAGGGGTGGGTTTGGCCCACTCC                                                                                                                                                                                                                                                                                                                                                                                                                                                                                                                                                                                                                                                                                                                                                                                                   |
| 18      | A7236 | NUP214-ABL               | ATTCATATCCATGGCTTATAGACTGTGTTTGACACGTGTGTACCATATTGTGT/CCACCGCGCAAGGTGGAGGGGTCT<br>ATA/TGTGTGCG/GCCTGTGGCAAAAGGTGCAAGTCTACATTGCTTCCACCAAAATCTATTCTGCGTGCCT                                                                                                                                                                                                                                                                                                                                                                                                                                                                                                                                                                                                                                                                                                                                                                                                                                                      |
| 19      | A7830 | NUP214-ABL               | ACCCACTTGCTCAGAGAATGTGTATGCATGTGTGGGAGCATGGGTGA/GCACACACCAGACCCCACTTAAGT/AAATGC<br>AGAGCGAGATCAAGAGATTGTGAGAACACGGGTTATGACATTTATAGATAAGGAGGCCAGTTCCTCTGAGGT                                                                                                                                                                                                                                                                                                                                                                                                                                                                                                                                                                                                                                                                                                                                                                                                                                                    |
| 20      | A4852 | SSBP2-CSF1R              | GTGCTGAGCTGGGCTCCTCCCTGGCACCAGAGCTAGAAACTTAAAGGAAGTGG/ACCCCGAGGGAGTTCGAC/T<br>ATGGTGCACAGGCACTAATGGTACTACCCAGGGGTGCGCCAGCTTAGAGCCACAGCCAAATGAACCTG                                                                                                                                                                                                                                                                                                                                                                                                                                                                                                                                                                                                                                                                                                                                                                                                                                                             |
| 21      | A6464 | SSBP2-CSF1R              | AACCTCCAGGCTCGATTTGGAAGGGCGGAGCTCAGGTGAACCTCAGAGCCTGCGTTATAGCTGGG/GCTCC/CTTC<br>AAGATAAACACCTGACAGATCTTTAAAGGACGAGCTGCTCAAAATATGTGCTTACAGATATGTGATTAAAA                                                                                                                                                                                                                                                                                                                                                                                                                                                                                                                                                                                                                                                                                                                                                                                                                                                        |
